# Supplementary material
Source: ML conference proceedings conference paper supplement (https://openaccess.thecvf.com/content/ICCV2025/html/Zhou_Hints_of_Prompt_ICCV_2025_paper.html)
Supplement: Supplementary file 1 [file Zhou_Hints_of_Prompt_ICCV_2025_supplemental.pdf]

# Hints of Prompt: Enhancing Visual Representation for Multimodal LLMs in Autonomous Driving

## Supplementary Material

### 1. Additional Experimental Results

#### 1.1. Data Efficiency and Lightweight Inference

| Dataset Ratio | Lingo-Judge $\uparrow$ |            |          |
|---------------|------------------------|------------|----------|
|               | LLaVA-v1.5             | HoP (Ours) | $\Delta$ |
| 25%           | 60.0                   | 64.0       | +4.0     |
| 50%           | 60.6                   | 65.6       | +5.0     |
| 100%          | 63.2                   | 67.8       | +4.6     |

Table 1. **Data-efficient domain adaptation of HoP.**  $\Delta$ : the performance gain of HoP over LLaVA-v1.5 at same data ratio.

| LLM          | Method                | LJ $\uparrow$      | Latency (ms) |
|--------------|-----------------------|--------------------|--------------|
| Qwen-v2-0.5B | Baseline              | 54.8               | 295          |
|              | + Efficient HoP       | 57.6 (+2.8)        | 302          |
| Qwen-v2.5-3B | Baseline              | 61.2               | 483          |
|              | + Efficient HoP       | <b>64.6</b> (+3.4) | 504          |
|              | + Efficient HoP (AWQ) | 64.2 (+3.0)        | <b>281</b>   |

Table 2. Performance comparison of Efficient HoP with baseline models. Green numbers indicate LJ (Lingo-Judge) improvements. AWQ indicates the quantized model.

As shown in Tab. 1 and Tab. 2, our HoP framework consistently outperforms LLaVA-v1.5 across all data regimes and model scales. It improves Lingo-Judge scores by up to +5.0 with only 50% training data, highlighting its effectiveness in low-data scenarios. Even with full data, HoP maintains a +4.6 advantage, demonstrating strong visual-language alignment. Furthermore, the Efficient HoP variant achieves 41.8% lower latency via 4-bit AWQ quantization while preserving competitive performance, confirming its scalability and deployment readiness.

#### 1.2. Evaluation on Planning Task

To assess the applicability of HoP in real-world autonomous driving scenarios, we evaluate it on the nuScenes open-loop planning benchmark following the OmniDrive setup. As shown in Tab. 3, HoP surpasses all baselines including DriveLM and LLaVA-v1.5 across multiple metrics (lower is better), such as L2 distance, collision rate, and intersection violations. This demonstrates HoP’s capability to generate more accurate and safer trajectories by leveraging enriched visual-language representations.

#### 1.3. Temporal Consistency Analysis

To further evaluate the stability of HoP’s predictions across time, we employ the Trajectory Prediction Consistency

| Method             | L2 (m) $\downarrow$ |             |             |             | Collision (%) $\downarrow$ |             |             |             | Intersection (%) $\downarrow$ |             |             |             |
|--------------------|---------------------|-------------|-------------|-------------|----------------------------|-------------|-------------|-------------|-------------------------------|-------------|-------------|-------------|
|                    | 1s                  | 2s          | 3s          | Avg.        | 1s                         | 2s          | 3s          | Avg.        | 1s                            | 2s          | 3s          | Avg.        |
| DriveLM $^\dagger$ | 1.32                | 2.08        | 3.01        | 2.14        | 0.42                       | 2.01        | 4.12        | 2.18        | 0.88                          | 3.12        | 6.45        | 3.48        |
| LLaVA-v1.5         | 1.28                | 2.13        | 3.22        | 2.21        | 0.16                       | 1.68        | 3.52        | 1.79        | 1.02                          | 3.44        | 7.00        | 3.82        |
| HoP                | <b>1.07</b>         | <b>1.81</b> | <b>2.62</b> | <b>1.83</b> | 0.25                       | <b>1.30</b> | <b>2.17</b> | <b>1.24</b> | <b>0.21</b>                   | <b>2.13</b> | <b>5.06</b> | <b>2.47</b> |

Table 3. Planning results on nuScenes.  $\dagger$ : fair DriveLM reproduction.

(TPC) metric introduced in MomAD. TPC measures frame-to-frame deviation between consecutive trajectory predictions. As shown in Tab. 4, HoP achieves lower TPC scores than LLaVA-v1.5, indicating improved temporal coherence, despite operating with frame-wise vision features.

| Method     | TPC@1s $\downarrow$ | TPC@2s $\downarrow$ | TPC@3s $\downarrow$ | Avg. $\downarrow$ |
|------------|---------------------|---------------------|---------------------|-------------------|
| LLaVA-v1.5 | 0.49                | 0.85                | 1.24                | 0.86              |
| HoP        | <b>0.46</b>         | <b>0.81</b>         | <b>1.18</b>         | <b>0.82</b>       |

Table 4. Trajectory prediction consistency (lower is better).

#### 1.4. Robustness Under Long-tail Distributions

We further evaluate HoP on CODA-LM, a benchmark designed to measure visual-language reasoning under long-tail distributions. As shown in Tab. 5, HoP achieves the best overall performance and outperforms CODA-VLM in three of four sub-metrics, despite the latter using a stronger backbone (LLaVA-Llama-3-8B-v1.1).

| Method     | Final Score $\uparrow$ | General $\uparrow$ | Region $\uparrow$ | Suggestion $\uparrow$ |
|------------|------------------------|--------------------|-------------------|-----------------------|
| LLaVA-v1.5 | 28.17                  | 19.30              | 42.06             | 23.16                 |
| CODA-VLM   | 63.62                  | 55.04              | <b>77.68</b>      | 58.14                 |
| HoP        | <b>64.38</b>           | <b>57.22</b>       | 76.93             | <b>59.00</b>          |

Table 5. Results on CODA-LM benchmark.

#### 1.5. Generalizability to Stronger MLLMs

To validate HoP’s compatibility with modern vision-language backbones, we integrate it with Qwen2.5-VL. As reported in Tab. 6, HoP yields a +2.6 gain in Lingo-Judge score over the Qwen2.5-VL base model, establishing a new SOTA on LingoQA and confirming HoP’s general applicability across architectures.

| Method         | LJ $\uparrow$ | BLEU-4 $\uparrow$ | METEOR $\uparrow$ | CIDEr $\uparrow$ |
|----------------|---------------|-------------------|-------------------|------------------|
| Qwen2.5-VL-7B  | 68.80         | 13.28             | <b>19.52</b>      | 60.31            |
| Qwen2.5-VL-HoP | <b>71.40</b>  | <b>13.31</b>      | 19.51             | <b>60.59</b>     |

Table 6. Results on LingoQA with Qwen2.5-VL.

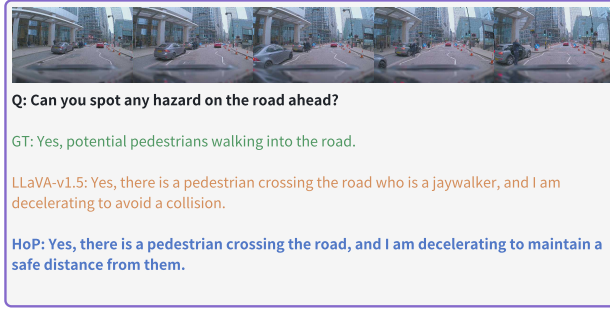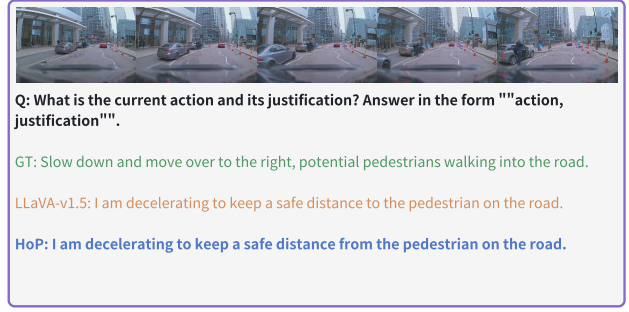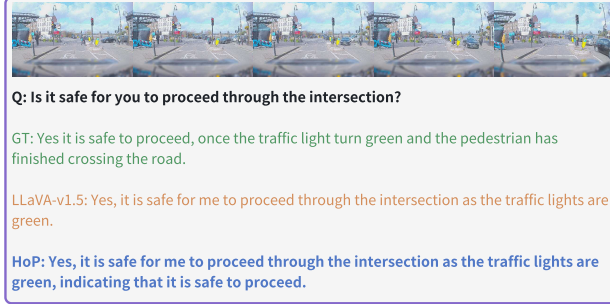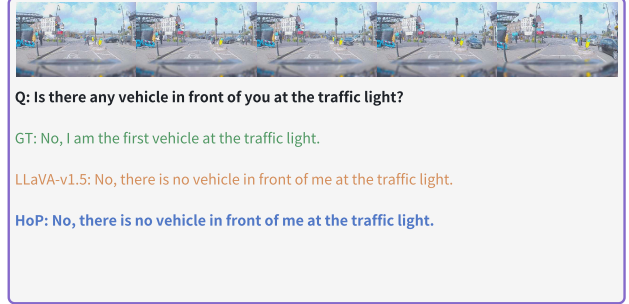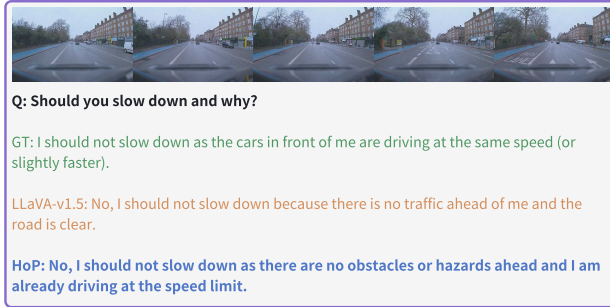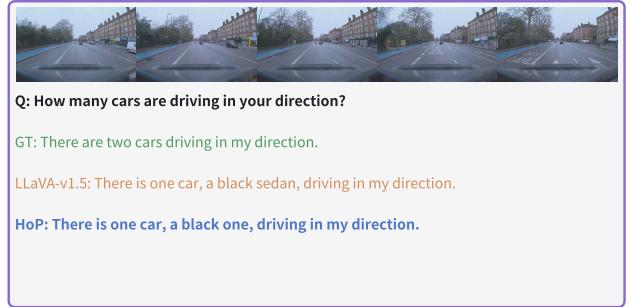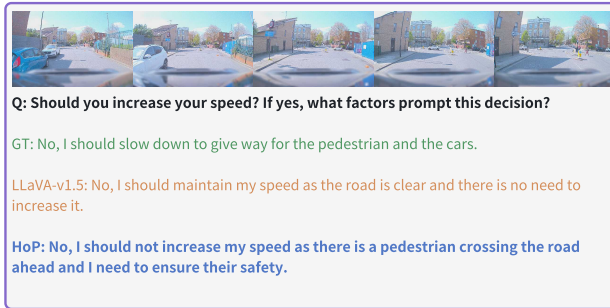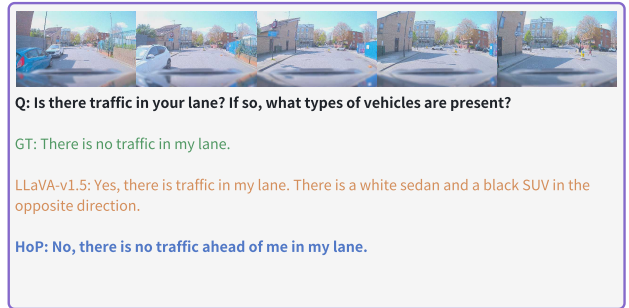

Figure 1. **Visualization results on the LingoQA dataset.** LLaVA-v1.5 serves as our baseline. Abbreviations: Q (Question), GT(Ground Truth).

## 2. More Quantitative Results

We present additional qualitative results of HoP on the LingoQA, DRAMA, and BDD-X datasets, as illustrated in Fig. 1, Fig. 2, and Fig. 3.

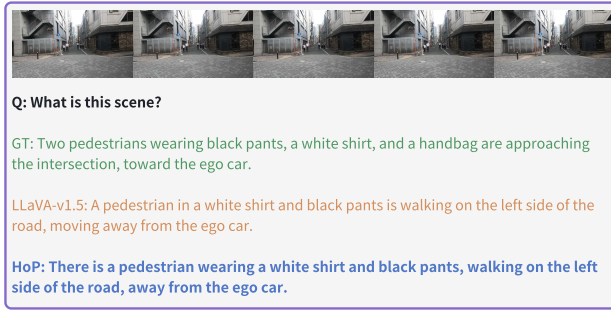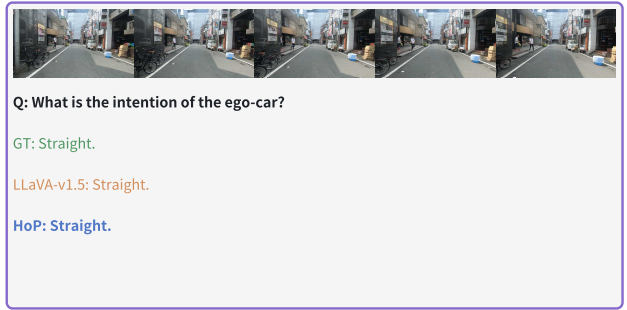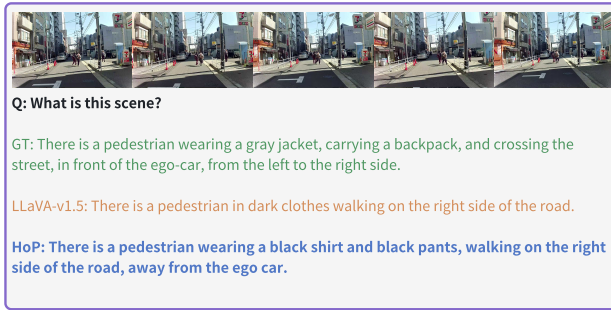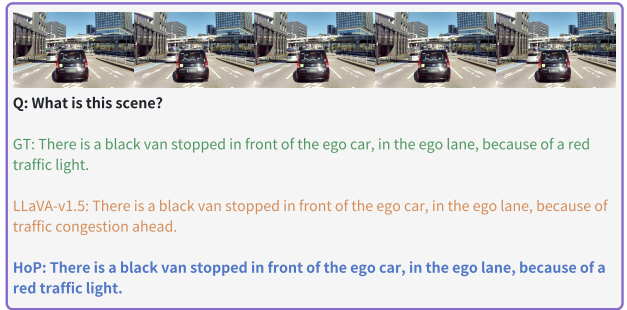

Figure 2. **Visualization results on the DRAMA dataset.** LLaVA-v1.5 serves as our baseline. Abbreviations: Q (Question), GT(Ground Truth).

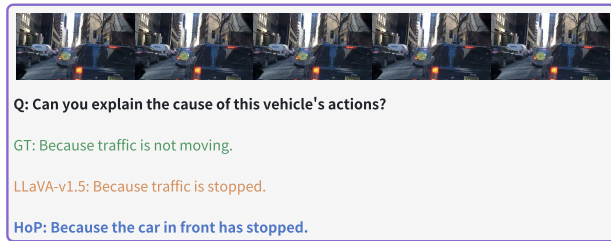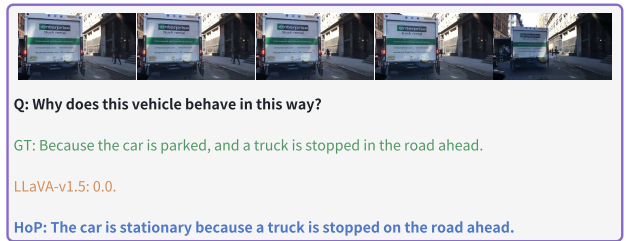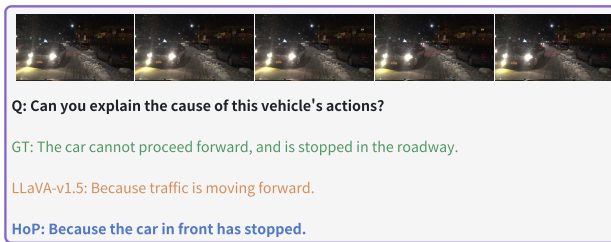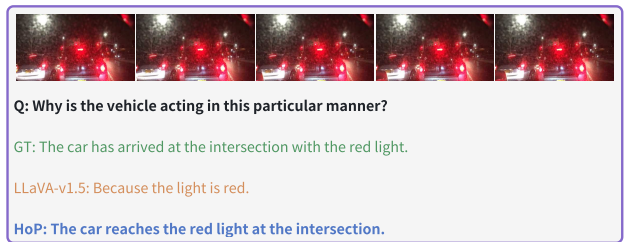

Figure 3. **Visualization results on the BDD-X dataset.** LLaVA-v1.5 serves as our baseline. Abbreviations: Q (Question), GT(Ground Truth).
